# Supplementary material for: Goat miR-92a-3p Targets APOL6 Gene to Regulate the Differentiation of Intramuscular Precursor Adipocytes
Source: MDPI journal article supplement (doi:10.3390/genes15010057), 2023-12-30
Supplement: s1 [file s1]

## 1. Cellular Temporal Expression Profile of miR-92a-3p

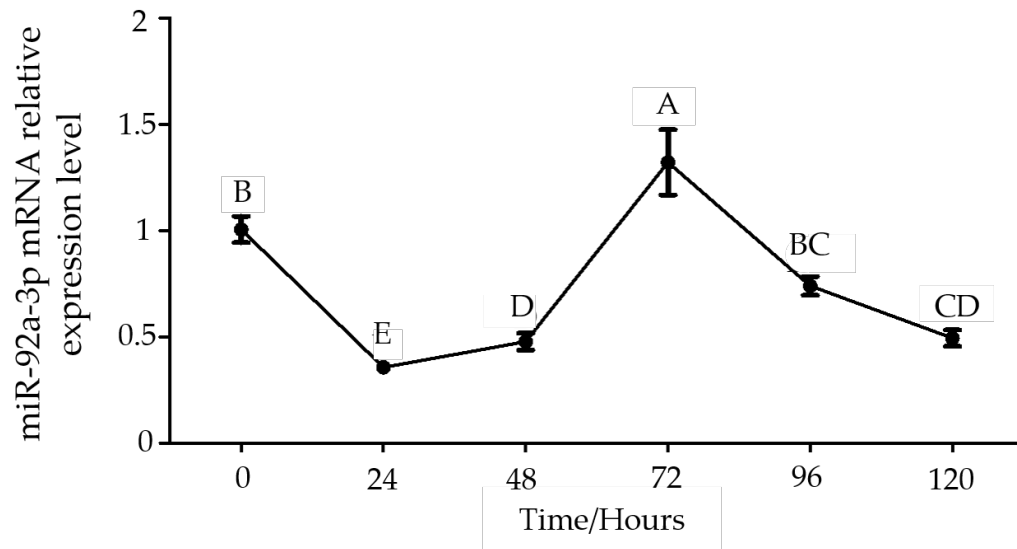

**Figure S1.** The temporal expression levels of miR-92a-3p in intramuscular adipocytes of goats.

## 2. Effect of miR-92a-3p on the Expression of *APOL6* and Cellular Temporal Expression Profile of *APOL6*

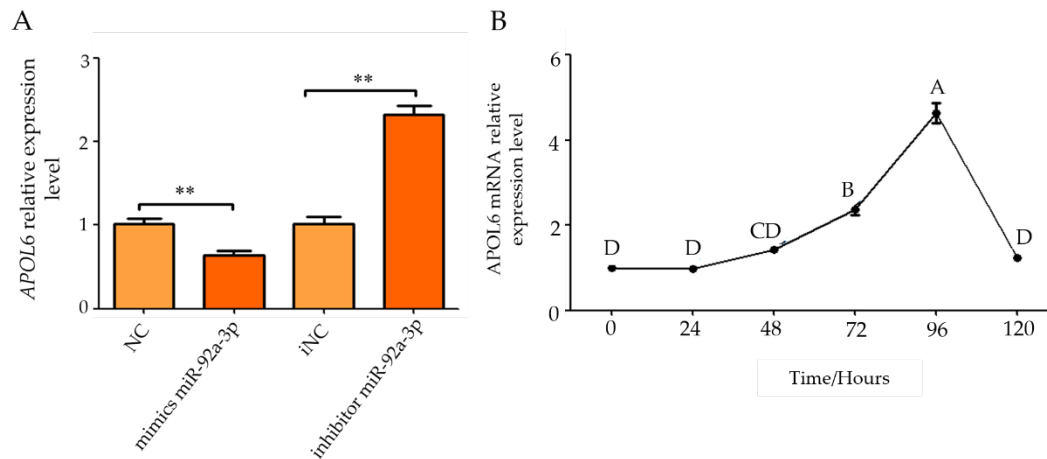

**Figure S2.** Effect of miR-92a-3p on the expression of *APOL6* and Cellular temporal expression profile of *APOL6*. A : Effects of miR-92A-3p on *APOL6* expression; B: The temporal expression levels of *APOL6* in intramuscular adipocytes of goats.
